# Supplementary material for: A nano-SPR model for predicting the dissolution rate of metal and metal oxide nanomaterials in the aqueous environment
Source: Royal Society of Chemistry journal article supplement (doi:10.1039/d4gc06312k), 2025-01-01
Supplement: d4gc06312k2.xlsx [file d4gc06312k2.xlsx]

## Sheet: orginal_dataset
Index	Reference	Doi	Nanoparticle	Shape	[k] Dissolution rate [1/h]	Y_final [mg/L]	%dissolved solid	solv_dG [kcal/mol]	dissociation enthalphy of bond [kcal/mol]	water_ads [kcal/mol]	Coating [0 bez coatingu, 1 z coatingiem]	Organic matter Concentration (mg/L)	pH	Primary Size (nm)	Total concentration [mg/L]	T [C]	IS (mM)	Dark;1 Light;0	MW	Noxygen	χ	χox	Z_metal	Zv_metal	PN_metal	(Z-Zv)/Zv_metal	1/(PN-1)_metal	Split
0	Kittler et al.13	https://doi.org/10.1021/cm100023p	Ag-PVP	Spherical	0.00047	0.074	7.4	1.37	35.63	-3.04	1	0	5.6	50	1	5	0	0	107.868	0	1.93	0	47	1	5	46	0.25	V
1	Kittler et al.13	https://doi.org/10.1021/cm100023p	Ag-PVP	Spherical	0.00047	0.057	11.4	1.37	35.63	-3.04	1	0	5.6	50	0.5	5	0	0	107.868	0	1.93	0	47	1	5	46	0.25	T
2	Mbanga et al.	https://www.sciencedirect.com/science/article/pii/S0887233322001552	TiO2	Spherical	0.000786	0.00198	0.099	90.76	211	-53.65	0	0	6.8	15	2	20	50	0	79.867	2	1.53	4	22	4	4	4.5	0.333333	T
3	Mbanga et al.	https://link.springer.com/article/10.1007/s11051-020-05132-x	Au-citrate	Spherical	0.000786	0.0416	0.26	1.95	173.02	4.72	1	0	8	14	0.16	20	3500	0	197	0	2.54	0	68	11	6	5.18182	0.2	V
4	Mbanga et al.	https://www.sciencedirect.com/science/article/pii/S0887233322001553	TiO2	Spherical	0.000812	0.00886	0.443	90.76	211	-53.65	0	0	8	20	2	20	3500	0	79.867	2	1.53	4	22	4	4	4.5	0.333333	T
5	Mbanga et al.	https://link.springer.com/article/10.1007/s11051-020-05132-x	Au-citrate	Spherical	0.000812	0.0288	0.18	1.95	173.02	4.72	1	0	6.8	14	0.16	20	50	0	197	0	2.54	0	68	11	6	5.18182	0.2	T
6	Zhou et al.11	10.1021/acs.est.6b03237	Ag	Spherical	0.0013	0.387	13.9209	1.37	35.63	-3.04	0	6.6	7	77	2.78	22	2	1	107.868	0	1.93	0	47	1	5	46	0.25	V
7	Zhou et al.11	10.1021/acs.est.6b03237	Ag	Spherical	0.00133	0.785	28.2374	1.37	35.63	-3.04	0	2.2	7	77	2.78	22	2	1	107.868	0	1.93	0	47	1	5	46	0.25	T
8	Kittler et al.13	https://doi.org/10.1021/cm100023p	Ag-PVP	Spherical	0.0017	0.19	8.63636	1.37	35.63	-3.04	1	0	5.6	50	2.2	25	0	0	107.868	0	1.93	0	47	1	5	46	0.25	T
9	Kittler et al.13	https://doi.org/10.1021/cm100023p	Ag-Citrate	Spherical	0.0017	0.15	10.7143	1.37	35.63	-3.04	1	0	5.6	50	1.4	25	0	1	107.868	0	1.93	0	47	1	5	46	0.25	V
10	Zhou et al.11	10.1021/acs.est.6b03237	Ag	Spherical	0.0018	1.525	54.8561	1.37	35.63	-3.04	0	0	7	77	2.78	22	2	1	107.868	0	1.93	0	47	1	5	46	0.25	T
11	Zhou et al.11	10.1021/acs.est.6b03237	Ag	Spherical	0.0018	0.523	18.8129	1.37	35.63	-3.04	0	6.6	7	77	2.78	22	2	0	107.868	0	1.93	0	47	1	5	46	0.25	T
12	Zhou et al.11	10.1021/acs.est.6b03237	Ag	Spherical	0.002	0.339	12.1942	1.37	35.63	-3.04	0	6.6	5	77	2.78	22	6	1	107.868	0	1.93	0	47	1	5	46	0.25	V
13	Kittler et al.13	https://doi.org/10.1021/cm100023p	Ag-Citrate	Spherical	0.0021	0.48	15	1.37	35.63	-3.04	1	0	5.6	50	3.2	25	0	1	107.868	0	1.93	0	47	1	5	46	0.25	T
14	Zhou et al.11	10.1021/acs.est.6b03237	Ag	Spherical	0.0022	0.633	22.7698	1.37	35.63	-3.04	0	2.2	5	77	2.78	22	6	1	107.868	0	1.93	0	47	1	5	46	0.25	V
15	Zhou et al.11	10.1021/acs.est.6b03237	Ag	Spherical	0.0023	0.555	19.964	1.37	35.63	-3.04	0	2.2	7	77	2.78	22	2	0	107.868	0	1.93	0	47	1	5	46	0.25	T
16	Zhou et al.11	10.1021/acs.est.6b03237	Ag	Spherical	0.0026	1.383	49.7482	1.37	35.63	-3.04	0	0	5	77	2.78	22	6	1	107.868	0	1.93	0	47	1	5	46	0.25	T
17	Zhou et al.11	10.1021/acs.est.6b03237	Ag	Spherical	0.0038	0.616	22.1583	1.37	35.63	-3.04	0	2.2	5	77	2.78	22	6	0	107.868	0	1.93	0	47	1	5	46	0.25	V
18	Zhou et al.11	10.1021/acs.est.6b03237	Ag	Spherical	0.005	2.058	74.0288	1.37	35.63	-3.04	0	0	5	77	2.78	22	6	0	107.868	0	1.93	0	47	1	5	46	0.25	T
19	Kittler et al.13	https://doi.org/10.1021/cm100023p	Ag-PVP	Spherical	0.0052	1.7	48.5714	1.37	35.63	-3.04	1	0	5.6	50	3.5	25	0	0	107.868	0	1.93	0	47	1	5	46	0.25	T
20	Zhou et al.11	10.1021/acs.est.6b03237	Ag	Spherical	0.0055	1.168	42.0144	1.37	35.63	-3.04	0	0	7	77	2.78	22	2	0	107.868	0	1.93	0	47	1	5	46	0.25	V
21	Peretyazhko et al.12	10.1021/es5023202	Ag-PEGSH	Spherical	0.0063	0.184	2.3	1.37	35.63	-3.04	1	0	7	13	8	20	0	0	107.868	0	1.93	0	47	1	5	46	0.25	T
22	Zhou et al.11	10.1021/acs.est.6b03237	Ag	Spherical	0.0076	0.255	9.17266	1.37	35.63	-3.04	0	6.6	5	77	2.78	22	6	0	107.868	0	1.93	0	47	1	5	46	0.25	T
23	Kittler et al.13	https://doi.org/10.1021/cm100023p	Ag-PVP	Spherical	0.0086	0.51	51	1.37	35.63	-3.04	1	0	5.6	50	1	25	0	0	107.868	0	1.93	0	47	1	5	46	0.25	V
24	Liu et al.14	https://doi.org/10.1021/es9035557	Ag-Citrate	Spherical	0.01	1.87	97	1.37	35.63	-3.04	1	0	5.68	4.8	2	20	0	1	107.868	0	1.93	0	47	1	5	46	0.25	T
25	Liu et al.14	https://doi.org/10.1021/es9035557	Ag-Citrate	Spherical	0.01	1.87	35	1.37	35.63	-3.04	1	0	5.68	4.8	0.05	4	0	1	107.868	0	1.93	0	47	1	5	46	0.25	T
26	Peretyazhko et al.12	10.1021/es5023202	Ag-PEGSH	Spherical	0.0104	0.5081	6.35135	1.37	35.63	-3.04	1	0	3	70	8	20	50	0	107.868	0	1.93	0	47	1	5	46	0.25	V
27	Peretyazhko et al.12	10.1021/es5023202	Ag-PEGSH	Spherical	0.0121	0.973	12.1622	1.37	35.63	-3.04	1	0	3	13	8	20	50	0	107.868	0	1.93	0	47	1	5	46	0.25	T
28	Kittler et al.13	https://doi.org/10.1021/cm100023p	Ag-PVP	Spherical	0.017	0.21	42	1.37	35.63	-3.04	1	0	5.6	50	0.5	25	0	0	107.868	0	1.93	0	47	1	5	46	0.25	V
29	Peretyazhko et al.12	10.1021/es5023202	Ag-PEGSH	Spherical	0.0179	0.595	7.4375	1.37	35.63	-3.04	1	0	7	9	8	20	0	0	107.868	0	1.93	0	47	1	5	46	0.25	T
30	Liu et al.14	https://doi.org/10.1021/es9035557	Ag-Citrate	Spherical	0.0246	0.19	100	1.37	35.63	-3.04	1	0	5.68	4.8	0.2	20	0	1	107.868	0	1.93	0	47	1	5	46	0.25	T
31	Liu et al.14	https://doi.org/10.1021/es9035557	Ag-Citrate	Spherical	0.0246	0.19	94	1.37	35.63	-3.04	1	0	5.68	4.8	0.05	20	0	1	107.868	0	1.93	0	47	1	5	46	0.25	V
32	Kittler et al.13	https://doi.org/10.1021/cm100023p	Ag-PVP	Spherical	0.025	1.8	51.4286	1.37	35.63	-3.04	1	0	5.6	50	3.5	37	0	0	107.868	0	1.93	0	47	1	5	46	0.25	T
33	Liu et al.14	https://doi.org/10.1021/es9035557	Ag-Citrate	Spherical	0.0252	0.048	100	1.37	35.63	-3.04	1	0	5.68	4.8	0.05	20	0	1	107.868	0	1.93	0	47	1	5	46	0.25	T
34	Liu et al.14	https://doi.org/10.1021/es9035557	Ag-Citrate	Spherical	0.0252	0.048	95	1.37	35.63	-3.04	1	0	5.68	4.8	0.05	37	0	1	107.868	0	1.93	0	47	1	5	46	0.25	V
35	Kittler et al.13	https://doi.org/10.1021/cm100023p	Ag-PVP	Spherical	0.026	0.88	88	1.37	35.63	-3.04	1	0	5.6	50	1	37	0	0	107.868	0	1.93	0	47	1	5	46	0.25	T
36	Peretyazhko et al.12	10.1021/es5023202	Ag-PEGSH	Spherical	0.0271	1.4486	18.1081	1.37	35.63	-3.04	1	0	3	9	8	20	50	0	107.868	0	1.93	0	47	1	5	46	0.25	T
37	Peretyazhko et al.12	10.1021/es5023202	Ag-PEGSH	Spherical	0.0517	1.68	21	1.37	35.63	-3.04	1	0	7	6	8	20	0	0	107.868	0	1.93	0	47	1	5	46	0.25	V
38	Kittler et al.13	https://doi.org/10.1021/cm100023p	Ag-PVP	Spherical	0.061	0.34	68	1.37	35.63	-3.04	1	0	5.6	50	0.5	37	0	0	107.868	0	1.93	0	47	1	5	46	0.25	T
39	Chakraborty et al.	https://link.springer.com/article/10.1007/s11051-018-4428-7#Sec15	CuO		0.063	1.272	16	77.33	92.38	-22.92	0	0	7	7	7.95	25	1	1	79.545	1	1.9	2	29	1	4	28	0.333333	T
40	Peretyazhko et al.12	10.1021/es5023202	Ag. PEGSH	Spherical	0.0688	3.1459	39.3243	1.37	35.63	-3.04	1	0	3	6	8	20	50	0	107.868	0	1.93	0	47	1	5	46	0.25	V
41	Chakraborty et al.	https://link.springer.com/article/10.1007/s11051-018-4428-7#Sec14	Ag-PEGSH		0.083	1.1925	15	77.33	92.38	-22.92	0	0	7	31	7.95	25	1	1	79.545	1	1.9	2	29	1	4	28	0.333333	T
42	Jiang et al. 17	https://doi.org/10.1021/acs.est.5b02406	ZnO	Spherical	0.2	0.6229	10.212	77.33	92.38	-22.92	0	40	8.58	28	6.1	25	100	1	81.379	1	1.65	2	30	2	4	14	0.333333	V
43	Majedi et sl.	10.1016/j.scitotenv.2014.07.082	ZnO	Spherical	0.209	1.09	5.45	77.33	92.38	-22.92	0	2	8.2	52	20	25	18.34	0	81.379	1	1.65	2	30	2	4	14	0.333333	T
44	Jiang et al. 17	https://doi.org/10.1021/acs.est.5b02406	ZnO	Spherical	0.22	0.6035	9.8929	77.33	92.38	-22.92	0	20	8.59	28	6.1	25	100	1	81.379	1	1.65	2	30	2	4	14	0.333333	T
45	Majedi et sl.	10.1016/j.scitotenv.2014.07.082	ZnO	Spherical	0.251	1.14	5.7	77.33	92.38	-22.92	0	2	8.2	52	20	4	18.34	0	81.379	1	1.65	2	30	2	4	14	0.333333	V
46	Jiang et al. 17	https://doi.org/10.1021/acs.est.5b02406	ZnO	Spherical	0.27	0.4088	6.70164	77.33	92.38	-22.92	0	5	8.54	28	6.1	25	100	1	81.379	1	1.65	2	30	2	4	14	0.333333	T
47	Jiang et al. 17	https://doi.org/10.1021/acs.est.5b02406	ZnO	Spherical	0.28	0.3309	5.42514	77.33	92.38	-22.92	0	1	8.55	28	6.1	25	100	1	81.379	1	1.65	2	30	2	4	14	0.333333	T
48	Jiang et al. 17	https://doi.org/10.1021/acs.est.5b02406	ZnO	Spherical	0.3	0.4867	7.97814	77.33	92.38	-22.92	0	10	8.54	28	6.1	25	100	1	81.379	1	1.65	2	30	2	4	14	0.333333	V
49	Jiang et al. 17	https://doi.org/10.1021/acs.est.5b02406	ZnO	Spherical	0.304	0.2725	4.46776	77.33	92.38	-22.92	0	0	8.57	28	6.1	25	100	1	81.379	1	1.65	2	30	2	4	14	0.333333	T
50	Majedi et sl.	10.1016/j.scitotenv.2014.07.082	ZnO	Spherical	0.307	2.04	10.2	77.33	92.38	-22.92	0	2	7.6	52	20	25	4.58	0	81.379	1	1.65	2	30	2	4	14	0.333333	T
51	Jiang et al. 17	https://doi.org/10.1021/acs.est.5b02406	ZnO	Spherical	0.31	0.9831	16.1158	77.33	92.38	-22.92	0	40	8.55	28	6.1	25	100	1	81.379	1	1.65	2	30	2	4	14	0.333333	V
52	Jiang et al. 17	https://doi.org/10.1021/acs.est.5b02406	ZnO	Spherical	0.322	0.3893	6.38251	77.33	92.38	-22.92	0	0	8.6	28	6.1	25	100	1	81.379	1	1.65	2	30	2	4	14	0.333333	T
53	Majedi et sl.	10.1016/j.scitotenv.2014.07.082	ZnO	Spherical	0.327	2.2	11	77.33	92.38	-22.92	0	2	7.6	52	20	4	4.58	0	81.379	1	1.65	2	30	2	4	14	0.333333	T
54	Jiang et al. 17	https://doi.org/10.1021/acs.est.5b02406	ZnO	Spherical	0.33	0.3212	5.26557	77.33	92.38	-22.92	0	10	8.57	28	6.1	25	100	1	81.379	1	1.65	2	30	2	4	14	0.333333	V
55	Liu et al.	https://link.springer.com/article/10.1007/s11356-018-3123-7	ZnO		0.33	1.93	51.8	77.33	92.38	-22.92	0	0	7.52	194.4	100	20	4.15	1	81.379	1	1.65	2	30	2	4	14	0.333333	T
56	Majedi et sl.	10.1016/j.scitotenv.2014.07.082	ZnO	Spherical	0.345	7.7	38.5	77.33	92.38	-22.92	0	2	6.6	52	20	25	0.572	0	81.379	1	1.65	2	30	2	4	14	0.333333	V
57	Jiang et al. 17	https://doi.org/10.1021/acs.est.5b02406	ZnO	Spherical	0.35	0.6132	10.0525	77.33	92.38	-22.92	0	20	8.55	28	6.1	25	100	1	81.379	1	1.65	2	30	2	4	14	0.333333	T
58	Jiang et al. 17	https://doi.org/10.1021/acs.est.5b02406	ZnO	Spherical	0.358	0.3407	5.5847	77.33	92.38	-22.92	0	0	8.62	28	6.1	25	100	1	81.379	1	1.65	2	30	2	4	14	0.333333	T
59	Jiang et al. 17	https://doi.org/10.1021/acs.est.5b02406	ZnO	Spherical	0.367	0.3309	5.42514	77.33	92.38	-22.92	0	0	8.57	28	6.1	25	100	1	81.379	1	1.65	2	30	2	4	14	0.333333	V
60	Liu et al.	https://link.springer.com/article/10.1007/s11356-018-3123-7	CuO		0.38	1.41	70.9	77.33	92.38	-22.92	0	0	7.52	277.7	100	20	4.15	1	79.545	1	1.9	2	29	1	4	28	0.333333	T
61	Majedi et sl.	10.1016/j.scitotenv.2014.07.082	ZnO	Spherical	0.386	7.85	39.25	77.33	92.38	-22.92	0	2	6.6	52	20	4	0.572	0	81.379	1	1.65	2	30	2	4	14	0.333333	T
62	Jiang et al. 17	https://doi.org/10.1021/acs.est.5b02406	ZnO	Spherical	0.39	0.4575	7.49945	77.33	92.38	-22.92	0	20	8.55	28	6.1	25	100	1	81.379	1	1.65	2	30	2	4	14	0.333333	V
63	Jiang et al. 17	https://doi.org/10.1021/acs.est.5b02406	ZnO	Spherical	0.4	0.6229	10.212	77.33	92.38	-22.92	0	1	8.57	28	6.1	25	100	1	81.379	1	1.65	2	30	2	4	14	0.333333	T
64	Chakraborty et al.	https://link.springer.com/article/10.1007/s11051-018-4428-7#Sec15	CuO		0.42	0.07155	0.9	77.33	92.38	-22.92	0	0	7.5	31	7.95	25	558	1	79.545	1	1.9	2	29	1	4	28	0.333333	T
65	Jiang et al. 17	https://doi.org/10.1021/acs.est.5b02406	ZnO	Spherical	0.436	0.3893	6.38251	77.33	92.38	-22.92	0	10	8.59	28	6.1	25	100	1	81.379	1	1.65	2	30	2	4	14	0.333333	V
66	Jiang et al. 17	https://doi.org/10.1021/acs.est.5b02406	ZnO	Spherical	0.456	0.3407	5.5847	77.33	92.38	-22.92	0	0	8.55	28	6.1	25	100	1	81.379	1	1.65	2	30	2	4	14	0.333333	T
67	Jiang et al. 17	https://doi.org/10.1021/acs.est.5b02406	ZnO	Spherical	0.456	0.6327	10.3716	77.33	92.38	-22.92	0	20	8.55	28	6.1	25	100	1	81.379	1	1.65	2	30	2	4	14	0.333333	T
68	Chakraborty et al.	https://link.springer.com/article/10.1007/s11051-018-4428-7#Sec16	CuO		0.464	0.11925	1.5	77.33	92.38	-22.92	0	0	7.5	7	7.95	25	558	1	79.545	1	1.9	2	29	1	4	28	0.333333	V
69	Jiang et al. 17	https://doi.org/10.1021/acs.est.5b02406	ZnO	Spherical	0.486	1.0317	16.9137	77.33	92.38	-22.92	0	1	8.6	28	6.1	25	100	1	81.379	1	1.65	2	30	2	4	14	0.333333	T
70	Jiang et al. 17	https://doi.org/10.1021/acs.est.5b02406	ZnO	Spherical	0.547	0.545	8.93443	77.33	92.38	-22.92	0	20	8.58	28	6.1	25	100	1	81.379	1	1.65	2	30	2	4	14	0.333333	V
71	Liu et al.	https://link.springer.com/article/10.1007/s11356-018-3123-7	ZnO		0.57	2.37	42.2	77.33	92.38	-22.92	0	0	7.44	194.4	100	20	7.76	1	81.379	1	1.65	2	30	2	4	14	0.333333	T
72	Wang et al.7	10.1016/j.watres.2014.09.031	Cu	Spherical	0.61	3.87	3.87	5	43.2	-17.12	0	5	7	150	100	25	113.2	1	63.545	0	1.9	0	29	1	4	28	0.333333	T
73	Jiang et al. 17	https://doi.org/10.1021/acs.est.5b02406	ZnO	Spherical	0.61	0.8857	14.5202	77.33	92.38	-22.92	0	40	8.57	28	6.1	25	100	1	81.379	1	1.65	2	30	2	4	14	0.333333	V
74	Liu et al.	https://link.springer.com/article/10.1007/s11356-018-3123-7	CuO		0.61	2	50	77.33	92.38	-22.92	0	0	7.44	277.7	100	20	7.76	1	81.379	1	1.65	2	30	2	4	14	0.333333	T
75	Liu et al.	https://link.springer.com/article/10.1007/s11356-018-3123-7	CuO		0.64	2.72	36.8	77.33	92.38	-22.92	0	0	7.31	277.7	100	20	6.11	1	79.545	1	1.9	2	29	1	4	28	0.333333	T
76	Liu et al.	https://link.springer.com/article/10.1007/s11356-018-3123-7	ZnO		0.68	3.71	27	77.33	92.38	-22.92	0	0	7.31	194.4	100	20	6.11	1	81.379	1	1.65	2	30	2	4	14	0.333333	V
77	Liu et al.	https://link.springer.com/article/10.1007/s11356-018-3123-7	CuO		0.73	3.21	31.2	77.33	92.38	-22.92	0	0	7.66	277.7	100	20	3.66	1	79.545	1	1.9	2	29	1	4	28	0.333333	T
78	Liu et al.	https://link.springer.com/article/10.1007/s11356-018-3123-7	ZnO		0.73	4.66	21.5	77.33	92.38	-22.92	0	0	7.66	194.4	100	20	3.66	1	81.379	1	1.65	2	30	2	4	14	0.333333	T
79	Jiang et al. 17	https://doi.org/10.1021/acs.est.5b02406	ZnO	Spherical	0.772	0.662	10.8525	77.33	92.38	-22.92	0	20	8.59	28	6.1	25	100	1	81.379	1	1.65	2	30	2	4	14	0.333333	V
80	Wang et al.7	10.1016/j.watres.2014.09.031	Cu	Spherical	0.8	8.86	8.86	5	43.2	-17.12	0	100	7	150	100	25	113.2	1	63.545	0	1.9	0	29	1	4	28	0.333333	T
81	Wang et al.7	10.1016/j.watres.2014.09.031	Cu	Spherical	0.81	1	1	5	43.2	-17.12	0	5	7	150	100	25	113.2	1	63.545	0	1.9	0	29	1	4	28	0.333333	T
82	Jiang et al. 17	https://doi.org/10.1021/acs.est.5b02406	ZnO	Spherical	0.87	0.9441	15.4776	77.33	92.38	-22.92	0	5	8.57	28	6.1	25	100	1	81.379	1	1.65	2	30	2	4	14	0.333333	V
83	Wang et al.7	10.1016/j.watres.2014.09.031	Cu	Spherical	0.92	2.04	2.04	5	43.2	-17.12	0	20	7	150	100	25	113.2	1	63.545	0	1.9	0	29	1	4	28	0.333333	T
84	Jiang et al. 17	https://doi.org/10.1021/acs.est.5b02406	ZnO	Spherical	0.971	0.798	13.082	77.33	92.38	-22.92	0	20	8.56	28	6.1	25	100	1	81.379	1	1.65	2	30	2	4	14	0.333333	V
85	Wang et al.7	10.1016/j.watres.2014.09.031	Cu	Spherical	0.98	5.73	5.73	5	43.2	-17.12	0	20	7	150	100	25	113.2	1	63.545	0	1.9	0	29	1	4	28	0.333333	T
86	Wang et al.7	10.1016/j.watres.2014.09.031	Cu	Spherical	0.98	1.66	1.66	5	43.2	-17.12	0	10	7	150	100	25	113.2	1	63.545	0	1.9	0	29	1	4	28	0.333333	T
87	Jiang et al. 17	https://doi.org/10.1021/acs.est.5b02406	ZnO	Spherical	1	1.5671	25.6896	77.33	92.38	-22.92	0	20	8.59	28	6.1	25	100	1	81.379	1	1.65	2	30	2	4	14	0.333333	V
88	Liu et al.	https://link.springer.com/article/10.1007/s11356-018-3123-7	CuO		1.08	4.35	23	77.33	92.38	-22.92	0	0	7.96	277.7	100	20	6.96	1	79.545	1	1.9	2	29	1	4	28	0.333333	T
89	Wang et al.7	10.1016/j.watres.2014.09.031	Cu	Spherical	1.11	5.05	5.05	5	43.2	-17.12	0	10	7	150	100	25	113.2	1	63.545	0	1.9	0	29	1	4	28	0.333333	T
90	Jiang et al. 17	https://doi.org/10.1021/acs.est.5b02406	ZnO	Spherical	1.11	1.8785	30.7956	77.33	92.38	-22.92	0	5	8.59	28	6.1	25	100	1	81.379	1	1.65	2	30	2	4	14	0.333333	V
91	Jiang et al. 17	https://doi.org/10.1021/acs.est.5b02406	ZnO	Spherical	1.11	0.487	7.98361	77.33	92.38	-22.92	0	20	8.6	28	6.1	25	100	1	81.379	1	1.65	2	30	2	4	14	0.333333	T
92	Jiang et al. 17	https://doi.org/10.1021/acs.est.5b02406	ZnO	Spherical	1.11	0.795	13.0328	77.33	92.38	-22.92	0	20	8.59	28	6.1	25	100	1	81.379	1	1.65	2	30	2	4	14	0.333333	T
93	Wang et al.7	10.1016/j.watres.2014.09.031	Cu	Spherical	1.12	3.16	3.16	5	43.2	-17.12	0	100	7	150	100	25	113.2	1	63.545	0	1.93	0	29	1	4	28	0.333333	V
94	Wang et al.7	10.1016/j.watres.2014.09.031	Cu	Spherical	1.17	2.39	2.39	5	43.2	-17.12	0	50	7	150	100	25	113.2	1	63.545	0	1.9	0	29	1	4	28	0.333333	T
95	Wang et al.7	10.1016/j.watres.2014.09.031	Cu	Spherical	1.25	7.91	7.91	5	43.2	-17.12	0	50	7	150	100	25	113.2	1	63.545	0	1.9	0	29	1	4	28	0.333333	T
96	Jiang et al. 17	https://doi.org/10.1021/acs.est.5b02406	ZnO	Spherical	1.25	1.3919	22.8175	77.33	92.38	-22.92	0	20	8.59	28	6.1	25	100	1	81.379	1	1.65	2	30	2	4	14	0.333333	V
97	Liu et al.	https://link.springer.com/article/10.1007/s11356-018-3123-7	ZnO		1.27	5.08	19.7	77.33	92.38	-22.92	0	0	7.96	194.4	100	20	6.96	1	81.379	1	1.65	2	30	2	4	14	0.333333	T
98	Wang et al.7	10.1016/j.watres.2014.09.031	Cu	Spherical	1.36	1	1	5	43.2	-17.12	0	5	7	150	100	25	113.2	1	63.545	0	1.9	0	29	1	4	28	0.333333	V
99	Jiang et al. 17	https://doi.org/10.1021/acs.est.5b02406	ZnO	Spherical	1.43	0.477	7.81967	77.33	92.38	-22.92	0	20	8.59	28	6.1	25	100	1	81.379	1	1.65	2	30	2	4	14	0.333333	T
100	Jiang et al. 17	https://doi.org/10.1021/acs.est.5b02406	ZnO	Spherical	1.51	0.642	10.5246	77.33	92.38	-22.92	0	20	8.55	28	6.1	25	100	1	81.379	1	1.65	2	30	2	4	14	0.333333	T
101	Jiang et al. 17	https://doi.org/10.1021/acs.est.5b02406	ZnO	Spherical	1.51	0.4672	7.65902	77.33	92.38	-22.92	0	20	8.59	28	6.1	25	100	1	81.379	1	1.65	2	30	2	4	14	0.333333	V
102	Jiang et al. 17	https://doi.org/10.1021/acs.est.5b02406	ZnO	Spherical	1.51	0.662	10.8525	77.33	92.38	-22.92	0	20	8.59	28	6.1	25	100	1	81.379	1	1.65	2	30	2	4	14	0.333333	T
103	Jiang et al. 17	https://doi.org/10.1021/acs.est.5b02406	ZnO	Spherical	1.58	2.4333	39.8907	77.33	92.38	-22.92	0	20	8.56	28	6.1	25	100	1	81.379	1	1.65	2	30	2	4	14	0.333333	T
104	Jiang et al. 17	https://doi.org/10.1021/acs.est.5b02406	ZnO	Spherical	1.77	1.06	17.377	77.33	92.38	-22.92	0	20	8.59	28	6.1	25	100	1	81.379	1	1.65	2	30	2	4	14	0.333333	V
105	Wang et al.7	10.1016/j.watres.2014.09.031	Cu	Spherical	1.86	7.8	7.8	5	43.2	-17.12	0	100	7	150	100	25	113.2	1	63.545	0	1.9	0	29	1	4	28	0.333333	T
106	Wang et al.7	10.1016/j.watres.2014.09.031	Cu	Spherical	2.16	13.79	13.79	5	43.2	-17.12	0	100	7	150	100	25	113.2	1	63.545	0	1.9	0	29	1	4	28	0.333333	T
107	Wang et al.7	10.1016/j.watres.2014.09.031	Cu	Spherical	2.26	2.66	2.66	5	43.2	-17.12	0	20	7	150	100	25	113.2	1	63.545	0	1.9	0	29	1	4	28	0.333333	V
108	Wang et al.7	10.1016/j.watres.2014.09.031	Cu	Spherical	2.42	4.33	4.33	5	43.2	-17.12	0	50	7	150	100	25	113.2	1	63.545	0	1.9	0	29	1	4	28	0.333333	T
109	Wang et al.7	10.1016/j.watres.2014.09.031	Cu	Spherical	2.49	10.78	10.78	5	43.2	-17.12	0	50	7	150	100	25	113.2	1	63.545	0	1.9	0	29	1	4	28	0.333333	T
110	Wang et al.7	10.1016/j.watres.2014.09.031	Cu	Spherical	2.59	8.3	8.3	5	43.2	-17.12	0	10	7	150	100	25	113.2	1	63.545	0	1.9	0	29	1	4	28	0.333333	V
111	Wang et al.7	10.1016/j.watres.2014.09.031	Cu	Spherical	2.86	1.41	1.41	5	43.2	-17.12	0	10	7	150	100	25	113.2	1	63.545	0	1.9	0	29	1	4	28	0.333333	T
112	Wang et al.7	10.1016/j.watres.2014.09.031	Cu	Spherical	3.23	8.69	8.69	5	43.2	-17.12	0	20	7	150	100	25	113.2	1	63.545	0	1.9	0	29	1	4	28	0.333333	V
113	Wang et al.7	10.1016/j.watres.2014.09.031	Cu	Spherical	3.61	6.6	6.6	5	43.2	-17.12	0	5	7	150	100	25	113.2	1	63.545	0	1.9	0	29	1	4	28	0.333333	T

## Sheet: Feature_selection
	Abbreviation	SE	DE	WA	CO	PS	MW	NO	χ	χo	ZM	VM	PN	RE	MK	OM	pH	TC	T	IS	DL
Decision Tree	DT
Random Forest	RF
Gradient Boosting Classifier	GBC
Extra Trees	ET
Logistic Regression	LR
Support Vector Classifier	SVC
Ridge Classifier	Ridge
Ada Boost Classifier	Ada
Linear Discriminant Analysis	LDA
Cat Boost Classifier	Cat
Lightgbm	Lighgbm
XGBoost	XGBoost
	Sum	10	9	6	2	3	2	1	4	1	6	0	0	7	6	3	7	8	8	4	7

## Sheet: training set
	SE	DE	PS	RE	pH	TC	T	DL	True class	Predicted Class
1	1.37	35.63	50	46	5.6	0.5	5	0	0	0
2	90.76	211	15	4.5	6.8	2	20	0	0	0
4	90.76	211	20	4.5	8	2	20	0	0	0
5	1.95	173.02	14	5.18182	6.8	0.16	20	0	0	0
7	1.37	35.63	77	46	7	2.78	22	1	0	0
8	1.37	35.63	50	46	5.6	2.2	25	0	1	1
10	1.37	35.63	77	46	7	2.78	22	1	1	0
11	1.37	35.63	77	46	7	2.78	22	0	1	1
13	1.37	35.63	50	46	5.6	3.2	25	1	1	1
14	1.37	35.63	77	46	5	2.78	22	1	1	1
16	1.37	35.63	77	46	5	2.78	22	1	1	1
17	1.37	35.63	77	46	5	2.78	22	0	1	1
19	1.37	35.63	50	46	5.6	3.5	25	0	1	1
20	1.37	35.63	77	46	7	2.78	22	0	1	1
22	1.37	35.63	77	46	5	2.78	22	0	1	1
23	1.37	35.63	50	46	5.6	1	25	0	1	1
25	1.37	35.63	4.8	46	5.68	0.05	4	1	1	0
26	1.37	35.63	70	46	3	8	20	0	1	1
28	1.37	35.63	50	46	5.6	0.5	25	0	1	1
29	1.37	35.63	9	46	7	8	20	0	1	1
31	1.37	35.63	4.8	46	5.68	0.05	20	1	1	1
32	1.37	35.63	50	46	5.6	3.5	37	0	1	1
34	1.37	35.63	4.8	46	5.68	0.05	37	1	1	1
35	1.37	35.63	50	46	5.6	1	37	0	1	1
37	1.37	35.63	6	46	7	8	20	0	1	1
38	1.37	35.63	50	46	5.6	0.5	37	0	1	1
40	1.37	35.63	6	46	3	8	20	0	1	1
41	77.33	92.38	31	28	7	7.95	25	1	1	2
43	77.33	92.38	52	14	8.2	20	25	0	2	2
44	77.33	92.38	28	14	8.59	6.1	25	1	2	2
46	77.33	92.38	28	14	8.54	6.1	25	1	2	2
47	77.33	92.38	28	14	8.55	6.1	25	1	2	2
49	77.33	92.38	28	14	8.57	6.1	25	1	2	2
50	77.33	92.38	52	14	7.6	20	25	0	2	2
52	77.33	92.38	28	14	8.6	6.1	25	1	2	2
53	77.33	92.38	52	14	7.6	20	4	0	2	2
55	77.33	92.38	194.4	14	7.52	100	20	1	2	2
56	77.33	92.38	52	14	6.6	20	25	0	2	2
58	77.33	92.38	28	14	8.62	6.1	25	1	2	2
59	77.33	92.38	28	14	8.57	6.1	25	1	2	2
61	77.33	92.38	52	14	6.6	20	4	0	2	2
62	77.33	92.38	28	14	8.55	6.1	25	1	2	2
64	77.33	92.38	31	28	7.5	7.95	25	1	2	2
65	77.33	92.38	28	14	8.59	6.1	25	1	2	2
67	77.33	92.38	28	14	8.55	6.1	25	1	2	2
68	77.33	92.38	7	28	7.5	7.95	25	1	2	2
70	77.33	92.38	28	14	8.58	6.1	25	1	2	2
71	77.33	92.38	194.4	14	7.44	100	20	1	2	2
73	77.33	92.38	28	14	8.57	6.1	25	1	2	2
74	77.33	92.38	277.7	14	7.44	100	20	1	2	2
76	77.33	92.38	194.4	14	7.31	100	20	1	2	2
77	77.33	92.38	277.7	28	7.66	100	20	1	2	2
79	77.33	92.38	28	14	8.59	6.1	25	1	2	2
80	5	43.2	150	28	7	100	25	1	2	2
82	77.33	92.38	28	14	8.57	6.1	25	1	2	2
83	5	43.2	150	28	7	100	25	1	2	2
85	5	43.2	150	28	7	100	25	1	2	2
86	5	43.2	150	28	7	100	25	1	2	2
88	77.33	92.38	277.7	28	7.96	100	20	1	2	2
89	5	43.2	150	28	7	100	25	1	2	2
91	77.33	92.38	28	14	8.6	6.1	25	1	2	2
92	77.33	92.38	28	14	8.59	6.1	25	1	2	2
94	5	43.2	150	28	7	100	25	1	2	2
95	5	43.2	150	28	7	100	25	1	2	2
97	77.33	92.38	194.4	14	7.96	100	20	1	2	2
98	5	43.2	150	28	7	100	25	1	2	2
100	77.33	92.38	28	14	8.55	6.1	25	1	2	2
101	77.33	92.38	28	14	8.59	6.1	25	1	2	2
103	77.33	92.38	28	14	8.56	6.1	25	1	2	2
104	77.33	92.38	28	14	8.59	6.1	25	1	2	2
106	5	43.2	150	28	7	100	25	1	2	2
107	5	43.2	150	28	7	100	25	1	2	2
109	5	43.2	150	28	7	100	25	1	2	2
110	5	43.2	150	28	7	100	25	1	2	2
112	5	43.2	150	28	7	100	25	1	2	2
113	5	43.2	150	28	7	100	25	1	2	2

## Sheet: validation set
	SE	DE	PS	RE	pH	TC	T	DL	True class	Predicted Class
0	1.37	35.63	50	46	5.6	1	5	0	0	0
3	1.95	173.02	14	5.18182	8	0.16	20	0	0	0
6	1.37	35.63	77	46	7	2.78	22	1	0	0
9	1.37	35.63	50	46	5.6	1.4	25	1	1	1
12	1.37	35.63	77	46	5	2.78	22	1	1	1
15	1.37	35.63	77	46	7	2.78	22	0	1	1
18	1.37	35.63	77	46	5	2.78	22	0	1	1
21	1.37	35.63	13	46	7	8	20	0	1	1
24	1.37	35.63	4.8	46	5.68	2	20	1	1	1
27	1.37	35.63	13	46	3	8	20	0	1	1
30	1.37	35.63	4.8	46	5.68	0.2	20	1	1	1
33	1.37	35.63	4.8	46	5.68	0.05	20	1	1	1
36	1.37	35.63	9	46	3	8	20	0	1	1
39	77.33	92.38	7	28	7	7.95	25	1	1	2
42	77.33	92.38	28	14	8.58	6.1	25	1	2	2
45	77.33	92.38	52	14	8.2	20	4	0	2	2
48	77.33	92.38	28	14	8.54	6.1	25	1	2	2
51	77.33	92.38	28	14	8.55	6.1	25	1	2	2
54	77.33	92.38	28	14	8.57	6.1	25	1	2	2
57	77.33	92.38	28	14	8.55	6.1	25	1	2	2
60	77.33	92.38	277.7	28	7.52	100	20	1	2	2
63	77.33	92.38	28	14	8.57	6.1	25	1	2	2
66	77.33	92.38	28	14	8.55	6.1	25	1	2	2
69	77.33	92.38	28	14	8.6	6.1	25	1	2	2
72	5	43.2	150	28	7	100	25	1	2	2
75	77.33	92.38	277.7	28	7.31	100	20	1	2	2
78	77.33	92.38	194.4	14	7.66	100	20	1	2	2
81	5	43.2	150	28	7	100	25	1	2	2
84	77.33	92.38	28	14	8.56	6.1	25	1	2	2
87	77.33	92.38	28	14	8.59	6.1	25	1	2	2
90	77.33	92.38	28	14	8.59	6.1	25	1	2	2
93	5	43.2	150	28	7	100	25	1	2	2
96	77.33	92.38	28	14	8.59	6.1	25	1	2	2
99	77.33	92.38	28	14	8.59	6.1	25	1	2	2
102	77.33	92.38	28	14	8.59	6.1	25	1	2	2
105	5	43.2	150	28	7	100	25	1	2	2
108	5	43.2	150	28	7	100	25	1	2	2
111	5	43.2	150	28	7	100	25	1	2	2

## Sheet: Evaluation for validation set v
	Accuracy	Precision	Recall	F1	Kappa	MCC	Balanced Acc	CV	CM
DT	0.947368	0.948421	0.947368	0.945005	0.894003	0.895674	0.858586	0.939394	[[ 2 1 0] [ 0 10 1] [ 0 0 24]]
RF	0.921053	0.926491	0.921053	0.90988	0.83921	0.843643	0.747475	0.904545	[[ 1 2 0] [ 0 10 1] [ 0 0 24]]
GB	0.921053	0.926491	0.921053	0.90988	0.83921	0.843643	0.747475	0.954545	[[ 1 2 0] [ 0 10 1] [ 0 0 24]]
ET	0.921053	0.926491	0.921053	0.90988	0.83921	0.843643	0.747475	0.937879	[[ 1 2 0] [ 0 10 1] [ 0 0 24]]
LR	0.947368	0.949561	0.947368	0.947661	0.898802	0.900115	0.875	0.930303	[[ 2 1 0] [ 0 11 0] [ 1 0 23]]
SVC	0.973684	0.974737	0.973684	0.973326	0.947586	0.949072	0.969697	0.947727	[[ 3 0 0] [ 0 10 1] [ 0 0 24]]
Ridge	0.973684	0.975877	0.973684	0.971625	0.947945	0.949318	0.888889	0.912879	[[ 2 1 0] [ 0 11 0] [ 0 0 24]]
Ada	0.868421	0.891184	0.868421	0.87146	0.74359	0.750692	0.767677	0.896212	[[ 2 1 0] [ 3 7 1] [ 0 0 24]]
LDA	0.921053	0.926491	0.921053	0.90988	0.83921	0.843643	0.747475	0.94697	[[ 1 2 0] [ 0 10 1] [ 0 0 24]]
Cat	0.921053	0.926491	0.921053	0.90988	0.83921	0.843643	0.747475	0.929545	[[ 1 2 0] [ 0 10 1] [ 0 0 24]]
lightgbm	0.921053	0.859023	0.921053	0.886316	0.840336	0.851998	0.666667	0.94697	[[ 0 3 0] [ 0 11 0] [ 0 0 24]]
XGBoost	0.894737	0.828988	0.894737	0.859918	0.783167	0.792661	0.636364	0.94697	[[ 0 3 0] [ 0 10 1] [ 0 0 24]]

## Sheet: Evaluation for training set
Train	Accuracy	Precision	Recall	F1	Kappa	MCC	Balanced Acc	CV	CM
DT	0.986842	0.989035	0.986842	0.987294	0.974114	0.974463	0.985507	0.956818	[[ 5 0 0] [ 1 22 0] [ 0 0 48]]
RF	0.973684	0.976146	0.973684	0.973752	0.947784	0.948768	0.971014	0.938636	[[ 5 0 0] [ 1 21 1] [ 0 0 48]]
GB	0.973684	0.973953	0.973684	0.973021	0.94713	0.947571	0.918841	0.912879	[[ 4 1 0] [ 0 22 1] [ 0 0 48]]
ET	0.986842	0.989035	0.986842	0.987294	0.974114	0.974463	0.985507	0.956818	[[ 5 0 0] [ 1 22 0] [ 0 0 48]]
LR	0.960526	0.960197	0.960526	0.960156	0.921189	0.921545	0.904348	0.921212	[[ 4 1 0] [ 1 21 1] [ 0 0 48]]
SVC	0.960526	0.968314	0.960526	0.96141	0.922158	0.924368	0.956522	0.947727	[[ 5 0 0] [ 2 20 1] [ 0 0 48]]
Ridge	0.973684	0.973684	0.973684	0.973684	0.94791	0.94791	0.918841	0.912879	[[ 4 1 0] [ 1 22 0] [ 0 0 48]]
Ada	0.75	0.935623	0.75	0.738233	0.551135	0.616983	0.724638	0.929545	[[ 5 0 0] [18 4 1] [ 0 0 48]]
LDA	0.973684	0.975789	0.973684	0.970943	0.947259	0.948667	0.866667	0.921212	[[ 3 2 0] [ 0 23 0] [ 0 0 48]]
Cat	0.960526	0.961891	0.960526	0.957725	0.920196	0.921395	0.852174	0.937879	[[ 3 2 0] [ 0 22 1] [ 0 0 48]]
LGB	0.986842	0.98739	0.986842	0.986251	0.973793	0.97415	0.933333	0.921212	[[ 4 1 0] [ 0 23 0] [ 0 0 48]]
XGB	0.986842	0.98739	0.986842	0.986251	0.973793	0.97415	0.933333	0.94697	[[ 4 1 0] [ 0 23 0] [ 0 0 48]]
